# Supplementary material
Source: publisher site journal article supplement (https://www.dovepress.com/article/405579)
Supplement: Supplementary file 1 [file get_supplementary_file.php]

**Table S1. The MICs of Cec4 and clinic antibiotics against CRAB strains ( $\mu\text{g/mL}$ ).**

| Strain number | Cec4     | Amikacin | Ceftazidime | Ciprofloxacin | Ceftriaxone | Cefotaxime | Ertapenem | Cefepime | Levofloxacin | Meropenem | Polymyxin B |          |
|---------------|----------|----------|-------------|---------------|-------------|------------|-----------|----------|--------------|-----------|-------------|----------|
| 1             | CRAB595  | 4        | >32         | >16           | >2          | >32        | >32       | >4       | >16          | >4        | >8          | $\leq 2$ |
| 2             | CRAB1258 | 4        | >32         | >16           | >2          | >32        | >32       | >4       | >16          | >4        | >8          | $\leq 2$ |
| 3             | CRAB1273 | 4        | >32         | >16           | >2          | >32        | >32       | >4       | >16          | >4        | >8          | $\leq 2$ |
| 4             | CRAB1349 | 4        | >32         | >16           | >2          | >32        | >32       | >4       | >16          | >4        | >8          | $\leq 2$ |
| 5             | CRAB1352 | 4        | >32         | >16           | >2          | >32        | >32       | >4       | >16          | >4        | >8          | $\leq 2$ |
| 6             | CRAB1449 | 4        | >32         | >16           | >2          | >32        | >32       | >4       | >16          | >4        | >8          | $\leq 2$ |
| 7             | CRAB1646 | 4        | >32         | >16           | >2          | >32        | >32       | >4       | >16          | >4        | >8          | $\leq 2$ |
| 8             | CRAB1718 | 4        | >32         | >16           | >2          | >32        | >32       | >4       | >16          | >4        | >8          | $\leq 2$ |
| 9             | CRAB2207 | 4        | >32         | >16           | >2          | >32        | >32       | >4       | >16          | >4        | >8          | $\leq 2$ |
| 10            | CRAB2214 | 4        | >32         | >16           | >2          | >32        | >32       | >4       | >16          | >4        | >8          | $\leq 2$ |
| 11            | CRAB2304 | 4        | >32         | >16           | >2          | >32        | >32       | >4       | >16          | >4        | >8          | $\leq 2$ |
| 12            | CRAB2418 | 4        | >32         | >16           | >2          | >32        | >32       | >4       | >16          | >4        | >8          | $\leq 2$ |
| 13            | CRAB2501 | 4        | >32         | >16           | >2          | >32        | >32       | >4       | >16          | >4        | >8          | $\leq 2$ |
| 14            | CRAB2596 | 4        | >32         | >16           | >2          | >32        | >32       | >4       | >16          | >4        | >8          | $\leq 2$ |
| 15            | CRAB2597 | 8        | >32         | >16           | >2          | >32        | >32       | >4       | >16          | >4        | >8          | $\leq 2$ |
| 16            | CRAB2737 | 4        | >32         | >16           | >2          | >32        | >32       | >4       | >16          | >4        | >8          | $\leq 2$ |
| 17            | CRAB2752 | 4        | >32         | >16           | >2          | >32        | >32       | >4       | >16          | >4        | >8          | $\leq 2$ |
| 18            | CRAB2770 | 4        | >32         | >16           | >2          | >32        | >32       | >4       | >16          | >4        | >8          | $\leq 2$ |
| 19            | CRAB2777 | 4        | >32         | >16           | >2          | >32        | >32       | >4       | >16          | >4        | >8          | $\leq 2$ |
| 20            | CRAB20   | 4        | >32         | >16           | >2          | >32        | >32       | >4       | >16          | >4        | >8          | 4        |
| 21            | CRAB21   | 4        | >32         | >16           | >2          | >32        | >32       | >4       | >16          | >4        | >8          | 4        |

**Table S2. Drug susceptibility information of clinical multi-drug resistant *A. baumannii* (AB4367992)**

| Antibiotics                 | multi-drug resistant <i>A. baumannii</i><br>4367992 |            |
|-----------------------------|-----------------------------------------------------|------------|
|                             | MIC ( $\mu\text{g/mL}$ )                            | Breakpoint |
| Amoxicillin/clavulanic acid | >16/8                                               | R          |
| Amikacin                    | >32                                                 | R          |
| Ampicillin                  | >16                                                 | R          |
| Aztreonam                   | >16                                                 | R          |
| Ceftazidime                 | >16                                                 | R          |
| Ceftazidime/clavulanic acid | >2                                                  | I          |
| Ciprofloxacin               | >2                                                  | R          |
| Ceftriaxone                 | >32                                                 | R          |
| Cefotaxime                  | >32                                                 | R          |
| Cefotaxime/clavulanic acid  | >4                                                  | I          |
| Cefuroxime                  | >16                                                 | I          |
| Cefazolin                   | >16                                                 | I          |
| Ertapenem                   | >4                                                  | R          |
| Cefepime                    | >16                                                 | R          |
| Cefoxitin                   | >16                                                 | I          |
| Gentamicin                  | >8                                                  | R          |
| Levofloxacin                | >4                                                  | R          |
| Meropenem                   | >8                                                  | R          |
| Piperacillin                | >64                                                 | R          |
| Ticarcillin/clavulanic acid | >64                                                 | R          |
| Tetracycline                | >8                                                  | R          |
| Tigecycline                 | <2                                                  | S          |
| Polymyxin B                 | $\leq 2$                                            | S          |
| Tobramycin                  | >8                                                  | R          |

Note: R: drug resistance; I: moderately sensitive; S, sensitive.
